# Supplementary material
Source: publisher figshare collection journal article supplement (https://gsajournals.figshare.com/ndownloader/files/14331770)
Supplement: Supplementary file 1 [file 14331770]

## Sheet: lincRNAs
Supplementary File S2. Different charachteristics of the identified novel linRNAs and ilncRNAs in sheep breeds. The blue marked cell denoted transcription factor. Also, the yellow marked cells indicate breed-specefic genes.
Transcript_name	Gene_name	Transcript_Length	Exon_Number	%GC	Left_Ensembl_Gene_ID	Left_Gene_Name	Distance	Right_Ensembl_Gene_ID	Right_Gene_Name	Distance	Expression_Lori-Bakhtiari	Expression_Zel	q_value_Gene
lincRNA.27817.1	lincRNA.27817	294	4	0.544218	ENSOARG00000000582	SLC25A53	-42042	ENSOARG00000000594	FAM199X	8338	0	5.12736	0.00840381
lincRNA.26835.7	lincRNA.26835	794	3	0.68136	ENSOARG00000010121	SHROOM2	-29658	ENSOARG00000010254	CLCN4	76291	12.8196	0	0.00840381
lincRNA.25403.6	lincRNA.25403	763	4	0.482307	ENSOARG00000006317	SMYD2	-441985	ENSOARG00000006410	COL12A1	57035	14.9526	2.01897	0.0148007
lincRNA.12819.3	lincRNA.12819	274	3	0.594891	ENSOARG00000015627	ensembl	-33812	ENSOARG00000015637	LGSN	175859	47.2716	0.471458	0.0351027
lincRNA.16164.1	lincRNA.16164	272	2	0.525735	ENSOARG00000004542	ensembl	-614699	ENSOARG00000004555	TSHZ1	15650	3.13877	0	0.0590268
lincRNA.21492.3	lincRNA.21492	751	4	0.483356	ENSOARG00000014174	CCM2	-34134	ENSOARG00000014216	MYO1G	3032	64.5217	19.2739	0.0590268
lincRNA.21492.4	lincRNA.21492	469	5	0.498934	ENSOARG00000014174	CCM2	-34134	ENSOARG00000014216	MYO1G	3032	64.5217	19.2739	0.0590268
lincRNA.21492.2	lincRNA.21492	363	4	0.498623	ENSOARG00000014174	CCM2	-34134	ENSOARG00000014216	MYO1G	3031	64.5217	19.2739	0.0590268
lincRNA.3473.5	lincRNA.3473	461	2	0.433839	ENSOARG00000000829	ACACA	-2684	ENSOARG00000001830	C17orf78	10669	80.0718	303.523	0.0668228
lincRNA.4242.1	lincRNA.4242	997	3	0.521565	ENSOARG00000012331	ORMDL3	-27578	ENSOARG00000012377	GSDMA	6207	4.74467	0.681439	0.120315
lincRNA.1877.1	lincRNA.1877	852	3	0.610329	ENSOARG00000020186	ADCY5	-1829	ENSOARG00000020191	HACD2	37869	5.32412	1.08375	0.121452
lincRNA.1877.2	lincRNA.1877	715	2	0.611189	ENSOARG00000020186	ADCY5	-1829	ENSOARG00000020191	HACD2	41246	5.32412	1.08375	0.121452
lincRNA.19585.1	lincRNA.19585	248	2	0.407258	ENSOARG00000015628	DUSP6	-13956	ENSOARG00000015648	POC1B	52431	4.29519	0	0.123647
lincRNA.13110.1	lincRNA.13110	223	2	0.475336	ENSOARG00000007733	ACVR1	-58731	ENSOARG00000007755	ACVR1C	72325	6.92048	0	0.139638
lincRNA.1974.1	lincRNA.1974	247	2	0.643725	ENSOARG00000020422	HES1	-125913	ENSOARG00000020426	OPA1	278262	0	4.77243	0.149912
lincRNA.6054.1	lincRNA.6054	274	2	0.521898	ENSOARG00000004650	SCOC	-12141	ENSOARG00000013136	PITRM1	370109	0	3.25712	0.15025
lincRNA.24113.2	lincRNA.24113	404	2	0.643564	ENSOARG00000016260	ensembl	-9977	ENSOARG00000016268	IDUA	12858	51.6545	17.7059	0.154236
lincRNA.5783.1	lincRNA.5783	256	2	0.585938	ENSOARG00000013922	TAF3	-40749	ENSOARG00000013941	GATA3	2837	2.58428	0	0.158848
lincRNA.10436.1	lincRNA.10436	257	2	0.540856	ENSOARG00000013148	ZSCAN2	-5056	ENSOARG00000013172	WDR73	5889	0	2.0402	0.205964
lincRNA.20124.1	lincRNA.20124	331	3	0.486405	ENSOARG00000010651	RAB5B	-7441	ENSOARG00000010667	CDK2	2351	0	1.09686	0.208246
lincRNA.14167.1	lincRNA.14167	1040	2	0.498077	ENSOARG00000014201	ensembl	-9119	ENSOARG00000014288	FGD2	11419	2.6381	0.568042	0.21003
lincRNA.20025.2	lincRNA.20025	2044	2	0.340998	ENSOARG00000004820	ATP23	-12444	ENSOARG00000004836	CTDSP2	78274	2.98021	1.0755	0.233403
lincRNA.20631.5	lincRNA.20631	577	3	0.436742	ENSOARG00000010352	CCND2	-23684	ENSOARG00000010367	PARP11	298383	20.4973	4.53589	0.242133
lincRNA.20631.4	lincRNA.20631	590	3	0.455932	ENSOARG00000010352	CCND2	-2127	ENSOARG00000010367	PARP11	298370	20.4973	4.53589	0.242133
lincRNA.11261.2	lincRNA.11261	244	2	0.368852	ENSOARG00000014064	ensembl	-101011	ENSOARG00000007760	EDEM1	837445	8241.97	3720.94	0.262347
lincRNA.11261.1	lincRNA.11261	265	2	0.366038	ENSOARG00000014064	ensembl	-101009	ENSOARG00000007760	EDEM1	837429	8241.97	3720.94	0.262347
lincRNA.13754.2	lincRNA.13754	701	3	0.417974	ENSOARG00000002939	RCC1	-20084	ENSOARG00000002971	PHACTR4	7032	17.4261	37.6146	0.280968
lincRNA.13754.1	lincRNA.13754	760	3	0.430263	ENSOARG00000002939	RCC1	-20083	ENSOARG00000002971	PHACTR4	7027	17.4261	37.6146	0.280968
lincRNA.12873.1	lincRNA.12873	538	2	0.462825	ENSOARG00000016259	ensembl	-23216	ENSOARG00000016273	HIBCH	11142	9.18558	2.58733	0.281815
lincRNA.16631.1	lincRNA.16631	622	2	0.651125	ENSOARG00000012615	METTL26	-8027	ENSOARG00000012750	MCRIP2	1106	0.920077	5.63235	0.282802
lincRNA.15678.5	lincRNA.15678	919	4	0.487486	ENSOARG00000015908	ANKRD1	-16736	ENSOARG00000015934	PCGF5	255097	4.95464	1.41398	0.286535
lincRNA.15678.1	lincRNA.15678	849	3	0.475854	ENSOARG00000015908	ANKRD1	-13737	ENSOARG00000015934	PCGF5	255097	4.95464	1.41398	0.286535
lincRNA.24748.1	lincRNA.24748	565	2	0.484956	ENSOARG00000020686	PYGL	-5211	ENSOARG00000020691	TRIM9	34627	4.23325	1.04647	0.29256
lincRNA.12065.1	lincRNA.12065	1265	2	0.376285	ENSOARG00000008161	FGD3	-22368	ENSOARG00000008190	BICD2	57650	1.57912	0.398638	0.298293
lincRNA.4786.1	lincRNA.4786	442	3	0.524887	ENSOARG00000014704	ABCA9	-16521	ENSOARG00000014912	ensembl	34554	5.29367	1.38445	0.304557
lincRNA.26467.1	lincRNA.26467	210	2	0.342857	ENSOARG00000006562	GDAP1	-27712	ENSOARG00000006730	PI15	480201	3.92329	0	0.304634
lincRNA.25558.4	lincRNA.25558	774	3	0.423773	ENSOARG00000009769	TRAF3IP2	-10957	ENSOARG00000009822	REV3L	10700	27.4443	12.3131	0.317569
lincRNA.25558.7	lincRNA.25558	1198	7	0.42571	ENSOARG00000009769	TRAF3IP2	-10959	ENSOARG00000009822	REV3L	13399	27.4443	12.3131	0.317569
lincRNA.25558.3	lincRNA.25558	844	3	0.420616	ENSOARG00000009769	TRAF3IP2	-10952	ENSOARG00000009822	REV3L	30915	27.4443	12.3131	0.317569
lincRNA.2695.1	lincRNA.2695	542	3	0.52952	ENSOARG00000015558	TBC1D5	-1038245	ENSOARG00000015604	SATB1	31912	4.59781	1.17161	0.320869
lincRNA.2695.2	lincRNA.2695	678	2	0.545723	ENSOARG00000015558	TBC1D5	-1038319	ENSOARG00000015604	SATB1	31850	4.59781	1.17161	0.320869
lincRNA.12292.1	lincRNA.12292	1601	3	0.434728	ENSOARG00000010699	SLC18A1	-143601	ENSOARG00000010719	LPL	67606	0.129603	1.52805	0.32496
lincRNA.21657.1	lincRNA.21657	928	2	0.448276	ENSOARG00000005863	TSGA13	-199198	ENSOARG00000005940	DNAJC8	102240	1.92494	0.276104	0.337676
lincRNA.3133.1	lincRNA.3133	1118	2	0.359571	ENSOARG00000017184	ensembl	-1425978	ENSOARG00000000553	GPC5	170890	2.2375	0.708683	0.369736
lincRNA.12929.3	lincRNA.12929	1098	5	0.401639	ENSOARG00000019595	ensembl	-471193	ENSOARG00000016715	ensembl	130057	8.78233	3.51944	0.38861
lincRNA.12929.5	lincRNA.12929	797	3	0.33877	ENSOARG00000019595	ensembl	-564790	ENSOARG00000016715	ensembl	130030	8.78233	3.51944	0.38861
lincRNA.12929.4	lincRNA.12929	975	4	0.354872	ENSOARG00000019595	ensembl	-564790	ENSOARG00000016715	ensembl	130030	8.78233	3.51944	0.38861
lincRNA.26334.1	lincRNA.26334	980	2	0.436735	ENSOARG00000020165	ZHX2	-1276620	ENSOARG00000011053	HAS2	14443	0.46543	2.22087	0.38861
lincRNA.27382.1	lincRNA.27382	875	2	0.377143	ENSOARG00000001977	ensembl	-14359	ENSOARG00000001998	ensembl	283504	2.27851	7.61338	0.388624
lincRNA.5826.1	lincRNA.5826	504	3	0.474206	ENSOARG00000017196	PARD3	-20642	ENSOARG00000017485	NRP1	556970	5.13119	0.861423	0.393004
lincRNA.23696.1	lincRNA.23696	930	3	0.533333	ENSOARG00000012002	SMIM14	-93198	ENSOARG00000012052	UBE2K	41225	2.24356	0.760546	0.429328
lincRNA.4920.1	lincRNA.4920	809	2	0.317676	ENSOARG00000007971	CD55	-6440	ENSOARG00000008208	CR2	114719	2.21038	0.65613	0.429683
lincRNA.2330.1	lincRNA.2330	345	2	0.449275	ENSOARG00000003740	SUCNR1	-19190	ENSOARG00000003776	ensembl	25219	13.2371	52.2259	0.433966
lincRNA.3081.1	lincRNA.3081	205	2	0.404878	ENSOARG00000015513	KLF12	-610403	ENSOARG00000015549	ensembl	389962	4.80504	0	0.434564
lincRNA.26037.3	lincRNA.26037	270	2	0.6	ENSOARG00000010818	ensembl	-21818	ENSOARG00000010835	ensembl	84047	35.6261	1.3626	0.434564
lincRNA.696.1	lincRNA.696	1946	3	0.39517	ENSOARG00000014907	ensembl	-187706	ENSOARG00000014936	LMO4	54971	1.98121	0.852799	0.437066
lincRNA.25556.4	lincRNA.25556	1278	5	0.475743	ENSOARG00000009732	FYN	-2925	ENSOARG00000009769	TRAF3IP2	45014	17.9947	4.32951	0.461258
lincRNA.25556.1	lincRNA.25556	4568	5	0.450306	ENSOARG00000009732	FYN	-1462	ENSOARG00000009769	TRAF3IP2	43288	17.9947	4.32951	0.461258
lincRNA.4100.5	lincRNA.4100	446	3	0.439462	ENSOARG00000005653	KAT7	-6258	ENSOARG00000005741	FAM117A	34941	83.0229	32.6867	0.464608
lincRNA.4100.4	lincRNA.4100	559	4	0.463327	ENSOARG00000005653	KAT7	-6245	ENSOARG00000005741	FAM117A	24832	83.0229	32.6867	0.464608
lincRNA.15168.1	lincRNA.15168	1023	2	0.568915	ENSOARG00000003309	ensembl	-37833	ENSOARG00000003377	C11orf84	3572	16.6828	9.30117	0.471648
lincRNA.21204.1	lincRNA.21204	1089	2	0.570248	ENSOARG00000017377	GNAI1	-710205	ENSOARG00000017469	ensembl	247501	1.77682	0.725099	0.473307
lincRNA.20818.1	lincRNA.20818	538	2	0.481413	ENSOARG00000018945	TCF20	-140089	ENSOARG00000018951	ensembl	13011	2.9658	0.789092	0.473307
lincRNA.4831.1	lincRNA.4831	438	2	0.573059	ENSOARG00000001370	CHI3L1	-101223	ENSOARG00000001514	ensembl	7211	4.63726	1.26224	0.473307
lincRNA.25280.1	lincRNA.25280	455	2	0.56044	ENSOARG00000002235	LRRC74A	-43691	ENSOARG00000002269	IRF2BPL	80404	4.06994	1.50644	0.473307
lincRNA.10367.4	lincRNA.10367	572	5	0.354895	ENSOARG00000010343	CHD2	-3029	ENSOARG00000010509	FAM174B	166479	30.8116	16.4066	0.473307
lincRNA.10367.3	lincRNA.10367	706	6	0.351275	ENSOARG00000010343	CHD2	-3001	ENSOARG00000010509	FAM174B	166422	30.8116	16.4066	0.473307
lincRNA.10367.1	lincRNA.10367	652	5	0.388037	ENSOARG00000010343	CHD2	-2990	ENSOARG00000010509	FAM174B	165378	30.8116	16.4066	0.473307
lincRNA.10367.2	lincRNA.10367	701	6	0.382311	ENSOARG00000010343	CHD2	-2990	ENSOARG00000010509	FAM174B	165378	30.8116	16.4066	0.473307
lincRNA.24444.1	lincRNA.24444	436	2	0.600917	ENSOARG00000019084	NFATC4	-2143	ENSOARG00000019090	RIPK3	23021	22.2493	10.1884	0.485744
lincRNA.24444.2	lincRNA.24444	418	2	0.607656	ENSOARG00000019084	NFATC4	-2143	ENSOARG00000019090	RIPK3	23021	22.2493	10.1884	0.485744
lincRNA.14755.1	lincRNA.14755	530	3	0.449057	ENSOARG00000000065	ensembl	-288212	ENSOARG00000000288	ECI2	108921	1.46364	0	0.488563
lincRNA.26883.1	lincRNA.26883	1307	3	0.429227	ENSOARG00000011696	GEMIN8	-7026	ENSOARG00000011704	GLRA2	486935	2.14624	1.04515	0.488566
lincRNA.19405.2	lincRNA.19405	687	2	0.513828	ENSOARG00000013243	CNOT11	-35612	ENSOARG00000013258	TBC1D8	49785	19.2588	10.193	0.489176
lincRNA.23423.1	lincRNA.23423	601	3	0.477537	ENSOARG00000017447	PRSS12	-2963	ENSOARG00000017811	NDST3	32726	39.3778	24.3127	0.489225
lincRNA.14627.1	lincRNA.14627	3015	2	0.340962	ENSOARG00000009905	MBOAT1	-256618	ENSOARG00000010155	RNF144B	1100931	1.93861	0.963584	0.492073
lincRNA.6482.3	lincRNA.6482	601	4	0.502496	ENSOARG00000018435	RPRD1B	-19040	ENSOARG00000018528	TGM2	20909	7.17482	14.3281	0.492073
lincRNA.6482.1	lincRNA.6482	558	3	0.5	ENSOARG00000018435	RPRD1B	-19026	ENSOARG00000018528	TGM2	20901	7.17482	14.3281	0.492073
lincRNA.6482.2	lincRNA.6482	756	3	0.468254	ENSOARG00000018435	RPRD1B	-19026	ENSOARG00000018528	TGM2	20901	7.17482	14.3281	0.492073
lincRNA.24664.4	lincRNA.24664	5711	2	0.369287	ENSOARG00000020336	CHP1	-10858	ENSOARG00000020342	OIP5	1561	10.2854	16.8538	0.499111
lincRNA.17595.2	lincRNA.17595	1124	3	0.477758	ENSOARG00000017793	ensembl	-158022	ENSOARG00000003459	TOMM20	310508	5.80113	2.96337	0.504747
lincRNA.17595.1	lincRNA.17595	1390	3	0.464029	ENSOARG00000017793	ensembl	-157772	ENSOARG00000003459	TOMM20	310496	5.80113	2.96337	0.504747
lincRNA.11694.2	lincRNA.11694	434	3	0.502304	ENSOARG00000016087	TSEN2	-12701	ENSOARG00000016452	PPARG	29350	0.474715	2.80537	0.505119
lincRNA.19855.1	lincRNA.19855	2383	5	0.402434	ENSOARG00000017752	AMIGO2	-183815	ENSOARG00000019457	SLC38A4	31840	0.969658	2.20622	0.511962
lincRNA.13090.1	lincRNA.13090	480	2	0.41875	ENSOARG00000006791	TANK	-648280	ENSOARG00000006870	RBMS1	1200	1.87254	0.254097	0.51277
lincRNA.20432.1	lincRNA.20432	1243	2	0.517297	ENSOARG00000020451	PDE3A	-64890	ENSOARG00000020470	ensembl	953610	1.204	0.508666	0.514528
lincRNA.15031.1	lincRNA.15031	548	3	0.470803	ENSOARG00000011862	ensembl	-9673	ENSOARG00000011870	PUS3	4200	1.8094	0.529548	0.517036
lincRNA.17813.1	lincRNA.17813	548	2	0.572993	ENSOARG00000008770	COMTD1	-58908	ENSOARG00000009025	ensembl	78775	3.78161	1.56447	0.517036
lincRNA.3907.1	lincRNA.3907	359	3	0.532033	ENSOARG00000001198	ensembl	-1650	ENSOARG00000004334	ensembl	5660	1.54918	0.153304	0.517036
lincRNA.11308.6	lincRNA.11308	1187	2	0.471778	ENSOARG00000009693	FOXP1	-1134	ENSOARG00000009751	MDFIC2	707102	16.1385	7.29092	0.518322
lincRNA.16531.3	lincRNA.16531	1701	4	0.450323	ENSOARG00000005061	TXNL1	-24774	ENSOARG00000005109	WDR7	25648	10.1863	5.91076	0.520967
lincRNA.16531.2	lincRNA.16531	1545	4	0.46343	ENSOARG00000005061	TXNL1	-20674	ENSOARG00000005109	WDR7	25618	10.1863	5.91076	0.520967
lincRNA.16531.1	lincRNA.16531	1808	5	0.474558	ENSOARG00000005061	TXNL1	-10198	ENSOARG00000005109	WDR7	25618	10.1863	5.91076	0.520967
lincRNA.3060.1	lincRNA.3060	4969	3	0.35641	ENSOARG00000017107	ensembl	-344501	ENSOARG00000014957	PCDH9	244183	2.16586	8.75181	0.521491
lincRNA.1808.1	lincRNA.1808	274	2	0.649635	ENSOARG00000019762	CD80	-10082	ENSOARG00000019768	ADPRH	3650	2.58748	0.322428	0.532155
lincRNA.24376.2	lincRNA.24376	582	2	0.426117	ENSOARG00000018551	ensembl	-121992	ENSOARG00000018567	SPESP1	28210	3.69732	1.3847	0.535006
lincRNA.24376.1	lincRNA.24376	1454	2	0.385144	ENSOARG00000018551	ensembl	-92015	ENSOARG00000018567	SPESP1	27653	3.69732	1.3847	0.535006
lincRNA.1914.1	lincRNA.1914	798	2	0.609023	ENSOARG00000020296	ensembl	-56421	ENSOARG00000020301	ensembl	6436	39.6717	14.6224	0.538286
lincRNA.13996.14	lincRNA.13996	633	3	0.554502	ENSOARG00000010812	ensembl	-60526	ENSOARG00000010902	RCC2	61679	22.9999	46.9065	0.541826
lincRNA.7328.1	lincRNA.7328	279	2	0.541219	ENSOARG00000005296	ZNF565	-8031	ENSOARG00000005303	ZNF567	46521	3.12868	0	0.547752
lincRNA.22282.1	lincRNA.22282	271	2	0.498155	ENSOARG00000012765	ensembl	-7269	ENSOARG00000012799	ensembl	8651	2.13967	0	0.553096
lincRNA.17323.1	lincRNA.17323	463	2	0.429806	ENSOARG00000017971	ZKSCAN1	-26801	ENSOARG00000017973	AZGP1	7087	1.91082	0.436896	0.553231
lincRNA.11185.1	lincRNA.11185	323	3	0.430341	ENSOARG00000003902	ensembl	-4137	ENSOARG00000014043	CYP8B1	51242	6.2161	1.17513	0.562036
lincRNA.4904.1	lincRNA.4904	347	2	0.610951	ENSOARG00000005917	EIF2D	-29182	ENSOARG00000006176	DYRK3	1409	1.26898	0.107077	0.564285
lincRNA.12790.1	lincRNA.12790	920	2	0.391304	ENSOARG00000015433	ensembl	-127218	ENSOARG00000015443	ensembl	2249115	72.1158	48.5891	0.565502
lincRNA.1552.1	lincRNA.1552	360	2	0.638889	ENSOARG00000013875	HUNK	-118396	ENSOARG00000013894	SCAF4	21678	2.47525	0.742885	0.570313
lincRNA.8227.1	lincRNA.8227	981	2	0.426096	ENSOARG00000012999	ZC3H12C	-12964	ENSOARG00000013286	RDX	16754	1.63245	0.793217	0.576346
lincRNA.23328.2	lincRNA.23328	326	2	0.466258	ENSOARG00000018356	SLCO6A1	-43993	ENSOARG00000018405	PAM	284372	0.438707	4.00598	0.577311
lincRNA.23851.1	lincRNA.23851	1787	2	0.369334	ENSOARG00000015052	AREG	-305884	ENSOARG00000015138	BTC	1964	50.2928	25.8542	0.583936
lincRNA.25882.1	lincRNA.25882	296	2	0.513514	ENSOARG00000002710	ensembl	-14369	ENSOARG00000004194	TIAM2	98452	1.74728	0.342271	0.588295
lincRNA.14555.1	lincRNA.14555	826	2	0.354722	ENSOARG00000005945	ensembl	-7862	ENSOARG00000005997	TDP2	14002	96.8635	45.1935	0.589753
lincRNA.26767.1	lincRNA.26767	1187	2	0.521483	ENSOARG00000017796	ensembl	-116844	ENSOARG00000017800	ensembl	101418	1.35463	0.658885	0.590229
lincRNA.17525.1	lincRNA.17525	236	2	0.576271	ENSOARG00000006178	FAM20C	-26907	ENSOARG00000006268	ensembl	101958	5.36455	1.04197	0.595285
lincRNA.3942.1	lincRNA.3942	737	2	0.447761	ENSOARG00000015404	MAP2K4	-2114	ENSOARG00000015496	MYOCD	397220	9.77863	5.95445	0.602211
lincRNA.21139.1	lincRNA.21139	618	2	0.349515	ENSOARG00000012133	ensembl	-26809	ENSOARG00000012192	FAM126A	52422	4.14858	2.04586	0.603015
lincRNA.27383.1	lincRNA.27383	874	2	0.37643	ENSOARG00000001977	ensembl	-14360	ENSOARG00000001998	ensembl	283504	3.2524	6.31413	0.605367
lincRNA.26021.2	lincRNA.26021	493	3	0.592292	ENSOARG00000005097	ERMARD	-2150	ENSOARG00000005108	DLL1	317124	4.29663	2.29169	0.605367
lincRNA.9583.1	lincRNA.9583	819	2	0.424908	ENSOARG00000012912	MAML3	-1641	ENSOARG00000012987	MGST2	4793	1.82422	0.722446	0.605741
lincRNA.18895.5	lincRNA.18895	801	5	0.44819	ENSOARG00000019516	PCBP1	-15816	ENSOARG00000019523	ASPRV1	44664	5.52761	2.98397	0.607171
lincRNA.18895.3	lincRNA.18895	900	4	0.412222	ENSOARG00000019516	PCBP1	-5239	ENSOARG00000019523	ASPRV1	44650	5.52761	2.98397	0.607171
lincRNA.18895.2	lincRNA.18895	487	4	0.49076	ENSOARG00000019516	PCBP1	-1444	ENSOARG00000019523	ASPRV1	87482	5.52761	2.98397	0.607171
lincRNA.26479.4	lincRNA.26479	491	3	0.409369	ENSOARG00000014583	PEX2	-421634	ENSOARG00000007482	ensembl	986600	177.173	119.327	0.609613
lincRNA.26479.3	lincRNA.26479	609	4	0.384236	ENSOARG00000014583	PEX2	-421596	ENSOARG00000007482	ensembl	986600	177.173	119.327	0.609613
lincRNA.26479.1	lincRNA.26479	509	3	0.396857	ENSOARG00000014583	PEX2	-421568	ENSOARG00000007482	ensembl	986600	177.173	119.327	0.609613
lincRNA.26479.2	lincRNA.26479	592	4	0.407095	ENSOARG00000014583	PEX2	-421568	ENSOARG00000007482	ensembl	986610	177.173	119.327	0.609613
lincRNA.26756.8	lincRNA.26756	1148	3	0.539199	ENSOARG00000016330	DSCC1	-10651	ENSOARG00000016365	ensembl	85060	22.3567	37.3224	0.610284
lincRNA.21895.1	lincRNA.21895	342	2	0.660819	ENSOARG00000004270	CRYGN	-7672	ENSOARG00000004390	RHEB	14271	3.52601	0.644555	0.610703
lincRNA.27124.1	lincRNA.27124	404	2	0.527228	ENSOARG00000005611	ensembl	-143937	ENSOARG00000009190	ensembl	44783	0.639257	1.9779	0.614211
lincRNA.22314.2	lincRNA.22314	551	3	0.509982	ENSOARG00000014459	RDH8	-5028	ENSOARG00000014548	ensembl	3992	2.14029	4.61127	0.615157
lincRNA.13247.3	lincRNA.13247	379	2	0.651715	ENSOARG00000012490	ensembl	-18604	ENSOARG00000019713	TMEM37	23474	1.83453	3.88256	0.619357
lincRNA.15036.1	lincRNA.15036	313	2	0.533546	ENSOARG00000012075	CDON	-111668	ENSOARG00000012238	RPUSD4	16621	0.36695	1.79215	0.62031
lincRNA.27115.1	lincRNA.27115	605	2	0.456198	ENSOARG00000008581	SMC1A	-11405	ENSOARG00000008726	IQSEC2	46398	7.02278	3.89908	0.621543
lincRNA.530.2	lincRNA.530	416	3	0.466346	ENSOARG00000008830	C1orf87	-1138251	ENSOARG00000008860	NFIA	25208	6.36427	3.08993	0.621874
lincRNA.10830.2	lincRNA.10830	1346	2	0.417533	ENSOARG00000015465	DICER1	-48958	ENSOARG00000015720	CLMN	9052	3.38135	1.9948	0.624213
lincRNA.6517.1	lincRNA.6517	275	2	0.483636	ENSOARG00000002597	CHD6	-58499	ENSOARG00000002824	ensembl	438602	3.61538	0.971606	0.626623
lincRNA.19492.2	lincRNA.19492	425	2	0.538824	ENSOARG00000014342	BCL2L11	-289239	ENSOARG00000014353	ensembl	224570	7.56434	4.36435	0.626841
lincRNA.19492.1	lincRNA.19492	653	2	0.506891	ENSOARG00000014342	BCL2L11	-289236	ENSOARG00000014353	ensembl	224570	7.56434	4.36435	0.626841
lincRNA.23788.1	lincRNA.23788	614	3	0.436482	ENSOARG00000004929	ensembl	-20866	ENSOARG00000005019	ensembl	90071	3.60622	6.31075	0.633389
lincRNA.21958.2	lincRNA.21958	370	2	0.505405	ENSOARG00000002683	SQSTM1	-12697	ENSOARG00000002936	MGAT4B	40821	2.83347	0.464258	0.637101
lincRNA.21958.1	lincRNA.21958	408	2	0.490196	ENSOARG00000002683	SQSTM1	-12509	ENSOARG00000002936	MGAT4B	42715	2.83347	0.464258	0.637101
lincRNA.26571.1	lincRNA.26571	637	2	0.485086	ENSOARG00000016387	SLC25A32	-6556	ENSOARG00000016509	CTHRC1	23515	0.799224	1.63177	0.637341
lincRNA.5107.1	lincRNA.5107	418	2	0.490431	ENSOARG00000007232	EXO1	-1153	ENSOARG00000007794	WDR64	4966	0.76049	2.19049	0.63739
lincRNA.2084.2	lincRNA.2084	240	2	0.579167	ENSOARG00000020649	KLHL6	-38561	ENSOARG00000020653	MCF2L2	6603	4.61819	2.26253	0.63901
lincRNA.9814.6	lincRNA.9814	919	4	0.534276	ENSOARG00000012777	SETD1B	-3306	ENSOARG00000012998	RHOF	1475	10.9756	6.906	0.64278
lincRNA.9814.2	lincRNA.9814	1791	6	0.562256	ENSOARG00000012777	SETD1B	-1702	ENSOARG00000012998	RHOF	1400	10.9756	6.906	0.64278
lincRNA.13927.1	lincRNA.13927	540	2	0.403704	ENSOARG00000008589	ECE1	-36437	ENSOARG00000008710	EIF4G3	85577	1.96466	0.966245	0.644022
lincRNA.11142.1	lincRNA.11142	293	3	0.491468	ENSOARG00000002241	CSRNP1	-17189	ENSOARG00000014010	CX3CR1	66099	5.2227	1.79119	0.644215
lincRNA.18041.6	lincRNA.18041	694	3	0.538905	ENSOARG00000008398	FAT1	-11317	ENSOARG00000004121	ensembl	20466	12.2366	17.9977	0.646173
lincRNA.17714.1	lincRNA.17714	382	2	0.541885	ENSOARG00000005141	TET1	-10028	ENSOARG00000005203	CCAR1	1200	2.4753	0.0299782	0.646601
lincRNA.27650.1	lincRNA.27650	282	2	0.393617	ENSOARG00000014432	ensembl	-155179	ENSOARG00000009690	ensembl	261895	3.51626	0.887963	0.649934
lincRNA.10527.3	lincRNA.10527	1068	2	0.450375	ENSOARG00000000224	OTUD7A	-69762	ENSOARG00000000333	ADAMTS7	8627	6.54144	11.2456	0.650833
lincRNA.10527.1	lincRNA.10527	573	3	0.5637	ENSOARG00000000224	OTUD7A	-67937	ENSOARG00000000333	ADAMTS7	8627	6.54144	11.2456	0.650833
lincRNA.10527.2	lincRNA.10527	420	2	0.564286	ENSOARG00000000224	OTUD7A	-67937	ENSOARG00000000333	ADAMTS7	8627	6.54144	11.2456	0.650833
lincRNA.21394.1	lincRNA.21394	332	2	0.503012	ENSOARG00000008301	ensembl	-78808	ENSOARG00000008341	MTURN	12723	1.98132	0.564504	0.656994
lincRNA.22365.3	lincRNA.22365	496	2	0.451613	ENSOARG00000017384	ensembl	-21718	ENSOARG00000017454	SMARCA4	22112	2.78624	1.51222	0.659054
lincRNA.11468.1	lincRNA.11468	286	2	0.479021	ENSOARG00000006352	POC1A	-4833	ENSOARG00000006432	DUSP7	12821	0.849951	3.4693	0.661064
lincRNA.13735.1	lincRNA.13735	543	2	0.52302	ENSOARG00000002545	EPB41	-7163	ENSOARG00000002668	OPRD1	10545	1.124	2.12026	0.663081
lincRNA.11710.2	lincRNA.11710	392	2	0.612245	ENSOARG00000017406	NR2C2	-1382	ENSOARG00000017791	FGD5	16717	4.84638	2.77504	0.667449
lincRNA.10112.3	lincRNA.10112	284	2	0.580986	ENSOARG00000008727	MORC2	-74210	ENSOARG00000009091	SMTN	2507	4.73517	2.54593	0.669922
lincRNA.10112.1	lincRNA.10112	774	2	0.604651	ENSOARG00000008727	MORC2	-66530	ENSOARG00000009091	SMTN	2507	4.73517	2.54593	0.669922
lincRNA.12535.1	lincRNA.12535	1084	2	0.417897	ENSOARG00000013265	SMARCA2	-328723	ENSOARG00000013287	ensembl	6095	2.08835	3.33005	0.671321
lincRNA.26598.1	lincRNA.26598	605	2	0.495868	ENSOARG00000018582	ZNF706	-171597	ENSOARG00000018661	YWHAZ	56733	0.537451	1.3357	0.672875
lincRNA.17343.2	lincRNA.17343	712	3	0.457865	ENSOARG00000018283	CYP3A24	-44297	ENSOARG00000018482	ZSCAN25	1020	2.41083	1.54922	0.672943
lincRNA.16215.1	lincRNA.16215	605	2	0.48595	ENSOARG00000005103	CDH7	-10079	ENSOARG00000005110	SERPINB8	1495296	1.1897	0.397105	0.675288
lincRNA.15956.1	lincRNA.15956	2851	2	0.313223	ENSOARG00000013772	ADRB1	-78019	ENSOARG00000013882	CCDC186	1252	3.26559	4.67903	0.678845
lincRNA.23192.1	lincRNA.23192	761	2	0.442838	ENSOARG00000013403	C1QTNF2	-32247	ENSOARG00000010347	ZBED8	2199	0.849877	1.71806	0.681702
lincRNA.3173.1	lincRNA.3173	535	2	0.450467	ENSOARG00000003624	DOCK9	-3322	ENSOARG00000004044	UBAC2	98909	3.17563	1.86552	0.684267
lincRNA.4825.1	lincRNA.4825	1117	3	0.567592	ENSOARG00000015884	HELZ	-40930	NA		NA	5.06701	2.98253	0.684549
lincRNA.28.1	lincRNA.28	320	2	0.475	ENSOARG00000018559	OTOS	-32950	ENSOARG00000018569	ensembl	9774	371.357	280.229	0.687636
lincRNA.14875.1	lincRNA.14875	475	2	0.469474	ENSOARG00000004477	EED	-133299	ENSOARG00000004654	PICALM	112968	1.04106	0.48015	0.692286
lincRNA.23034.1	lincRNA.23034	202	2	0.514851	ENSOARG00000001779	NDFIP1	-272421	ENSOARG00000001851	FGF1	140563	2.63361	12.619	0.692634
lincRNA.12149.1	lincRNA.12149	269	3	0.576208	ENSOARG00000003498	RMI1	-4328	ENSOARG00000008935	ensembl	2533	0.566142	2.0027	0.692893
lincRNA.14834.3	lincRNA.14834	557	3	0.382406	ENSOARG00000014377	ensembl	-832426	ENSOARG00000003206	CHORDC1	28458	4.36811	2.55183	0.694106
lincRNA.23924.4	lincRNA.23924	958	2	0.371608	ENSOARG00000001565	SEC31A	-11525	ENSOARG00000001821	THAP9	5934	8.84322	4.89047	0.694106
lincRNA.2007.2	lincRNA.2007	296	3	0.489865	ENSOARG00000020484	LPP	-406869	ENSOARG00000020487	BCL6	177557	4.68924	8.31498	0.694489
lincRNA.2007.3	lincRNA.2007	351	3	0.481481	ENSOARG00000020484	LPP	-406884	ENSOARG00000020487	BCL6	177545	4.68924	8.31498	0.694489
lincRNA.2007.1	lincRNA.2007	415	3	0.486747	ENSOARG00000020484	LPP	-406827	ENSOARG00000020487	BCL6	177541	4.68924	8.31498	0.694489
lincRNA.16882.1	lincRNA.16882	364	4	0.557692	ENSOARG00000007368	ensembl	-10709	ENSOARG00000007471	MKL2	55608	4.04917	6.15297	0.696094
lincRNA.12893.2	lincRNA.12893	628	5	0.434713	ENSOARG00000016390	SLC40A1	-72835	ENSOARG00000016410	WDR75	48950	2.86231	1.09323	0.697373
lincRNA.5725.1	lincRNA.5725	285	2	0.547368	ENSOARG00000010523	JAG1	-208127	ENSOARG00000010789	BTBD3	1166109	1.34343	3.50259	0.699155
lincRNA.6525.6	lincRNA.6525	698	3	0.5	ENSOARG00000003072	ensembl	-421403	ENSOARG00000003117	ensembl	230305	11.6415	6.38106	0.702781
lincRNA.6525.4	lincRNA.6525	628	2	0.544586	ENSOARG00000003072	ensembl	-420166	ENSOARG00000003117	ensembl	230305	11.6415	6.38106	0.702781
lincRNA.6525.2	lincRNA.6525	724	3	0.544199	ENSOARG00000003072	ensembl	-420166	ENSOARG00000003117	ensembl	230305	11.6415	6.38106	0.702781
lincRNA.6525.1	lincRNA.6525	1406	2	0.497155	ENSOARG00000003072	ensembl	-420166	ENSOARG00000003117	ensembl	229461	11.6415	6.38106	0.702781
lincRNA.8464.1	lincRNA.8464	532	3	0.370301	ENSOARG00000006517	PDE3B	-114097	ENSOARG00000006724	ensembl	5858	1.64437	0.813528	0.704242
lincRNA.9146.1	lincRNA.9146	2096	3	0.382156	ENSOARG00000007689	SLC38A9	-81232	ENSOARG00000007720	PLPP1	4967	1.84482	1.22814	0.70483
lincRNA.15680.1	lincRNA.15680	739	3	0.493911	ENSOARG00000015908	ANKRD1	-213196	ENSOARG00000015934	PCGF5	64934	1.57971	0.813092	0.706974
lincRNA.19607.1	lincRNA.19607	230	2	0.378261	ENSOARG00000015737	DCN	-35718	ENSOARG00000015748	ensembl	316759	4.39045	1.03444	0.709785
lincRNA.17412.1	lincRNA.17412	862	2	0.62529	ENSOARG00000003096	FBXL18	-45741	ENSOARG00000003179	TNRC18	24913	4.01613	1.27293	0.709825
lincRNA.26591.2	lincRNA.26591	3223	2	0.472541	ENSOARG00000018325	GRHL2	-61020	ENSOARG00000018582	ZNF706	193195	2.87357	1.31854	0.711584
lincRNA.5724.1	lincRNA.5724	783	2	0.565773	ENSOARG00000010317	MKKS	-20418	ENSOARG00000010370	SLX4IP	116251	1.84058	2.64915	0.718203
lincRNA.12591.2	lincRNA.12591	468	2	0.363248	ENSOARG00000013600	KIAA2026	-111235	ENSOARG00000013628	IL33	13821	14.3687	20.3762	0.720386
lincRNA.7542.3	lincRNA.7542	264	2	0.560606	ENSOARG00000008799	ZNF576	-6888	ENSOARG00000011400	SRRM5	2698	28.0296	20.5355	0.721618
lincRNA.7671.2	lincRNA.7671	369	2	0.528455	ENSOARG00000011113	MEIS3	-8577	ENSOARG00000011168	SLC8A2	1812	3.64548	1.61171	0.722479
lincRNA.65.1	lincRNA.65	522	3	0.568966	ENSOARG00000018722	HDAC4	-113326	ENSOARG00000000265	TWIST2	54046	2.6604	3.67126	0.726602
lincRNA.5964.7	lincRNA.5964	441	2	0.46712	ENSOARG00000004560	RPL7A	-24636	ENSOARG00000014717	JCAD	242973	6.88396	9.16343	0.727489
lincRNA.578.1	lincRNA.578	731	2	0.456908	ENSOARG00000010117	JAK1	-158727	ENSOARG00000010184	AK4	92677	2.20887	0.798255	0.728407
lincRNA.24600.1	lincRNA.24600	2272	4	0.382482	ENSOARG00000000756	ZNF770	-120089	ENSOARG00000020011	DPH6	204678	2.62708	5.53292	0.728848
lincRNA.14477.1	lincRNA.14477	952	2	0.497899	ENSOARG00000017935	ensembl	-10724	ENSOARG00000018000	ZKSCAN8	7845	0.981019	1.54579	0.734276
lincRNA.15216.3	lincRNA.15216	702	2	0.505698	ENSOARG00000014878	SCGB1A1	-9710	ENSOARG00000014988	AHNAK	57048	178.238	116.561	0.734459
lincRNA.12769.1	lincRNA.12769	1777	2	0.432189	ENSOARG00000009055	ensembl	-92486	ENSOARG00000015157	ensembl	152861	2.14003	1.43324	0.737695
lincRNA.6561.1	lincRNA.6561	540	2	0.457407	ENSOARG00000005370	TP53TG5	-2189	ENSOARG00000005422	DBNDD2	15439	3.68186	2.30561	0.738748
lincRNA.26683.1	lincRNA.26683	626	3	0.410543	ENSOARG00000008848	FAM92A	-369976	ENSOARG00000009003	TRIQK	356600	1.68829	0.946515	0.739783
lincRNA.18339.1	lincRNA.18339	314	2	0.624204	ENSOARG00000018987	TMEM250	-1911	ENSOARG00000004768	NACC2	56994	2.07523	0.996864	0.743322
lincRNA.22393.1	lincRNA.22393	1257	2	0.376293	ENSOARG00000016439	ensembl	-22855	ENSOARG00000018694	ensembl	5150	1.25593	1.83825	0.745778
lincRNA.27099.1	lincRNA.27099	567	4	0.43739	ENSOARG00000006221	ensembl	-9681	ENSOARG00000006361	FGD1	9343	1.65794	0.429338	0.747325
lincRNA.6688.1	lincRNA.6688	344	3	0.479651	ENSOARG00000004471	ensembl	-171598	ENSOARG00000004573	VAC14	228785	0.873735	1.44194	0.748485
lincRNA.21923.1	lincRNA.21923	431	2	0.580046	ENSOARG00000007377	UBE3C	-8795	ENSOARG00000007460	DNAJB6	50621	1.67769	0.817791	0.749767
lincRNA.21660.1	lincRNA.21660	290	3	0.562069	ENSOARG00000005940	DNAJC8	-86215	ENSOARG00000005989	MKLN1	55229	2.14806	4.06421	0.750554
lincRNA.12030.1	lincRNA.12030	847	2	0.466352	ENSOARG00000007799	ensembl	-58065	ENSOARG00000003312	DIRAS2	780493	1.23799	0.800816	0.756496
lincRNA.15925.1	lincRNA.15925	515	2	0.458252	ENSOARG00000010704	ADRA2A	-46540	ENSOARG00000010969	GPAM	1067267	0.69243	1.2541	0.759094
lincRNA.27122.1	lincRNA.27122	583	2	0.555746	ENSOARG00000009115	GPR173	-65172	ENSOARG00000005611	ensembl	15899	6.48554	4.52549	0.760665
lincRNA.21262.13	lincRNA.21262	614	2	0.438111	ENSOARG00000008278	ensembl	-226284	ENSOARG00000002293	KMT2E	20537	19.2084	12.795	0.762654
lincRNA.21262.2	lincRNA.21262	2187	6	0.474166	ENSOARG00000008278	ensembl	-153720	ENSOARG00000002293	KMT2E	19963	19.2084	12.795	0.762654
lincRNA.21262.12	lincRNA.21262	2295	2	0.461874	ENSOARG00000008278	ensembl	-211192	ENSOARG00000002293	KMT2E	19521	19.2084	12.795	0.762654
lincRNA.5448.2	lincRNA.5448	630	3	0.404762	ENSOARG00000014202	TNR	-429967	ENSOARG00000014362	RFWD2	19998	16.0122	12.3331	0.770547
lincRNA.17828.2	lincRNA.17828	796	3	0.458543	ENSOARG00000009025	ensembl	-25002	ENSOARG00000009033	LRMDA	638427	3.23767	2.31639	0.774925
lincRNA.11325.1	lincRNA.11325	464	2	0.545259	ENSOARG00000010656	SLC25A26	-163060	ENSOARG00000010733	MAGI1	241156	1.10007	0.623488	0.785469
lincRNA.25704.2	lincRNA.25704	582	5	0.37457	ENSOARG00000020012	ensembl	-175723	ENSOARG00000013186	SYNCRIP	31369	7.89185	5.50572	0.787412
lincRNA.25704.1	lincRNA.25704	1943	5	0.44982	ENSOARG00000020012	ensembl	-175205	ENSOARG00000013186	SYNCRIP	30540	7.89185	5.50572	0.787412
lincRNA.12066.9	lincRNA.12066	330	2	0.651515	ENSOARG00000008125	ensembl	-8635	ENSOARG00000008136	SUSD3	20881	26.5751	21.0568	0.787428
lincRNA.17956.2	lincRNA.17956	689	2	0.687954	ENSOARG00000005527	DLGAP2	-48970	ENSOARG00000005571	ensembl	5511	1.70808	2.4843	0.790794
lincRNA.8027.3	lincRNA.8027	445	2	0.557303	ENSOARG00000003367	SMIM17	-35299	ENSOARG00000003373	ensembl	4314	4.24699	2.40993	0.791366
lincRNA.1456.1	lincRNA.1456	1836	2	0.349129	ENSOARG00000007518	ensembl	-9336	ENSOARG00000011110	RGS5	3067	21.5231	14.3848	0.793289
lincRNA.8941.4	lincRNA.8941	220	2	0.609091	ENSOARG00000011743	MPEG1	-9626	ENSOARG00000013054	ensembl	21332	11.5071	9.27891	0.796072
lincRNA.16443.1	lincRNA.16443	519	2	0.535645	ENSOARG00000002282	SETBP1	-594403	ENSOARG00000002339	SLC14A2	6994	16.29	21.2544	0.79699
lincRNA.6988.2	lincRNA.6988	378	3	0.388889	ENSOARG00000017964	IRX3	-594990	ENSOARG00000011056	IRX5	11149	16.2079	10.9083	0.797252
lincRNA.6988.1	lincRNA.6988	2548	5	0.377551	ENSOARG00000017964	IRX3	-593135	ENSOARG00000011056	IRX5	8063	16.2079	10.9083	0.797252
lincRNA.2890.2	lincRNA.2890	528	2	0.488636	ENSOARG00000006012	FOXO1	-147342	ENSOARG00000006021	ensembl	518580	2.17986	1.45506	0.797383
lincRNA.8105.2	lincRNA.8105	705	2	0.492199	ENSOARG00000003842	A1BG	-2070	ENSOARG00000019935	ensembl	8779	6.33907	4.5801	0.797383
lincRNA.7550.1	lincRNA.7550	356	3	0.505618	ENSOARG00000008983	ZNF404	-12939	ENSOARG00000008991	ZNF233	17541	1.25335	2.4109	0.799508
lincRNA.25145.1	lincRNA.25145	465	3	0.531183	ENSOARG00000001048	CRIPT	-50584	ENSOARG00000021177	ZFP36L1	239060	1.65806	1.01945	0.800206
lincRNA.7198.2	lincRNA.7198	599	4	0.497496	ENSOARG00000004067	CCNE1	-5683	ENSOARG00000004087	URI1	91491	2.09234	0.55536	0.80264
lincRNA.7198.1	lincRNA.7198	521	3	0.495202	ENSOARG00000004067	CCNE1	-5665	ENSOARG00000004087	URI1	91496	2.09234	0.55536	0.80264
lincRNA.11207.1	lincRNA.11207	279	3	0.462366	ENSOARG00000004538	ensembl	-6204	ENSOARG00000014056	ZNF660	7647	4.28542	2.61024	0.803502
lincRNA.6505.4	lincRNA.6505	831	4	0.547533	ENSOARG00000018868	ensembl	-44239	ENSOARG00000018960	RALGAPB	15217	27.5914	22.2444	0.804333
lincRNA.2543.1	lincRNA.2543	984	2	0.431911	ENSOARG00000011030	NDUFV3	-32161	ENSOARG00000011069	PKNOX1	13092	2.23413	0.679082	0.804658
lincRNA.5699.1	lincRNA.5699	459	2	0.529412	ENSOARG00000010317	MKKS	-10220	ENSOARG00000010370	SLX4IP	140185	3.31425	1.71636	0.812637
lincRNA.9573.2	lincRNA.9573	1227	2	0.357783	ENSOARG00000012236	RNF150	-4535	ENSOARG00000012281	ELMOD2	133905	4.77178	3.8796	0.812637
lincRNA.5233.1	lincRNA.5233	723	3	0.396957	ENSOARG00000008554	SLC25A33	-116466	ENSOARG00000008681	SPSB1	47029	4.34746	2.92846	0.813882
lincRNA.26409.1	lincRNA.26409	330	3	0.563636	ENSOARG00000017043	ARMC1	-11899	ENSOARG00000017075	MTFR1	11509	1.24877	2.16737	0.817239
lincRNA.25383.1	lincRNA.25383	1847	2	0.336221	ENSOARG00000003762	PATL2	-35582	ENSOARG00000003782	B2M	14770	195.358	158.78	0.818454
lincRNA.26722.1	lincRNA.26722	614	2	0.537459	ENSOARG00000012892	PSKH2	-71784	ENSOARG00000012954	CA2	294195	0.856542	1.36064	0.820928
lincRNA.5232.1	lincRNA.5232	601	3	0.557404	ENSOARG00000008554	SLC25A33	-104128	ENSOARG00000008681	SPSB1	60433	5.50402	2.86486	0.823423
lincRNA.8988.1	lincRNA.8988	295	2	0.671186	ENSOARG00000003578	FGF18	-42649	ENSOARG00000003627	SMIM23	272600	0.944619	2.02264	0.825401
lincRNA.6399.2	lincRNA.6399	427	4	0.545667	ENSOARG00000009354	ensembl	-83358	ENSOARG00000009759	ITCH	16903	12.632	15.3921	0.827941
lincRNA.6399.3	lincRNA.6399	280	3	0.532143	ENSOARG00000009354	ensembl	-83364	ENSOARG00000009759	ITCH	9476	12.632	15.3921	0.827941
lincRNA.14104.1	lincRNA.14104	296	2	0.503378	ENSOARG00000010470	MLN	-188873	ENSOARG00000010502	GRM4	27180	0.840447	1.52685	0.828508
lincRNA.2940.1	lincRNA.2940	395	2	0.58481	ENSOARG00000011803	MEDAG	-64125	ENSOARG00000011856	ALOX5AP	33340	4.45811	3.26179	0.831515
lincRNA.25066.1	lincRNA.25066	1710	2	0.523392	ENSOARG00000021129	SIX1	-7583	ENSOARG00000021130	SIX4	46722	3.89602	3.17725	0.836754
lincRNA.6986.1	lincRNA.6986	458	2	0.423581	ENSOARG00000017964	IRX3	-544047	ENSOARG00000011056	IRX5	67477	3.24913	2.20628	0.8395
lincRNA.5732.1	lincRNA.5732	881	2	0.407491	ENSOARG00000010523	JAG1	-725294	ENSOARG00000010789	BTBD3	721940	1.35768	0.975623	0.841983
lincRNA.18018.1	lincRNA.18018	1142	3	0.49387	ENSOARG00000007614	ACSL1	-130043	ENSOARG00000007647	HELT	10836	3.88599	5.88527	0.845073
lincRNA.5695.4	lincRNA.5695	1177	2	0.450297	ENSOARG00000010085	ensembl	-2485	ENSOARG00000010152	ANKEF1	54156	11.151	13.4525	0.845658
lincRNA.5953.1	lincRNA.5953	340	3	0.564706	ENSOARG00000004560	RPL7A	-159151	ENSOARG00000014717	JCAD	116543	1.80071	1.09469	0.848927
lincRNA.12977.1	lincRNA.12977	564	2	0.342199	ENSOARG00000017403	AGPS	-46260	ENSOARG00000017431	NFE2L2	118984	2.84883	2.13844	0.849816
lincRNA.3110.5	lincRNA.3110	813	3	0.365314	ENSOARG00000017135	SPRY2	-200564	ENSOARG00000000468	ensembl	176431	14.1503	10.6173	0.851457
lincRNA.3110.1	lincRNA.3110	1989	3	0.31825	ENSOARG00000017135	SPRY2	-105000	ENSOARG00000000468	ensembl	175118	14.1503	10.6173	0.851457
lincRNA.6055.1	lincRNA.6055	1139	4	0.446883	ENSOARG00000004635	ensembl	-520569	ENSOARG00000012925	KLF6	19734	3.24967	2.14132	0.851842
lincRNA.26508.1	lincRNA.26508	372	3	0.435484	ENSOARG00000009384	FABP12	-58699	ENSOARG00000009469	NOV	38288	1.25462	1.49855	0.854397
lincRNA.3559.3	lincRNA.3559	609	3	0.505747	ENSOARG00000013768	COPRS	-192446	ENSOARG00000013970	RAB11FIP4	27542	12.5233	16.6136	0.854435
lincRNA.3559.1	lincRNA.3559	959	3	0.520334	ENSOARG00000013768	COPRS	-191881	ENSOARG00000013970	RAB11FIP4	27539	12.5233	16.6136	0.854435
lincRNA.16390.1	lincRNA.16390	376	3	0.444149	ENSOARG00000010473	EPB41L3	-46391	ENSOARG00000010530	ensembl	270656	1.1219	0.462252	0.854542
lincRNA.23997.3	lincRNA.23997	748	3	0.540107	ENSOARG00000008465	BOD1L1	-1183807	ENSOARG00000008716	ensembl	151549	8.96127	11.4419	0.870114
lincRNA.4114.2	lincRNA.4114	1123	3	0.504898	ENSOARG00000006032	PHB	-22686	ENSOARG00000006129	ZNF652	44544	2.90166	2.34777	0.870891
lincRNA.19154.1	lincRNA.19154	364	2	0.516484	ENSOARG00000004763	FOXN2	-204448	ENSOARG00000016139	ensembl	76269	3.19605	5.9346	0.877519
lincRNA.1951.1	lincRNA.1951	698	3	0.538682	ENSOARG00000020383	BDH1	-6164	ENSOARG00000020386	APOD	64181	0.909778	1.46992	0.887818
lincRNA.2867.1	lincRNA.2867	373	2	0.536193	ENSOARG00000008666	KCNRG	-105169	ENSOARG00000008694	DLEU7	711364	3.29931	2.5584	0.888902
lincRNA.13035.1	lincRNA.13035	319	2	0.407524	ENSOARG00000002188	METTL8	-33691	ENSOARG00000002212	TLK1	185116	4.37726	5.55374	0.892963
lincRNA.26480.1	lincRNA.26480	1871	2	0.291823	ENSOARG00000014583	PEX2	-466295	ENSOARG00000007482	ensembl	911804	4.16344	4.78404	0.89383
lincRNA.6464.1	lincRNA.6464	3055	2	0.38036	ENSOARG00000016807	SAMHD1	-5400	ENSOARG00000017008	ensembl	14217	34.8407	43.0587	0.897746
lincRNA.21659.1	lincRNA.21659	399	2	0.518797	ENSOARG00000005940	DNAJC8	-84856	ENSOARG00000005989	MKLN1	170828	1.47667	1.0859	0.897776
lincRNA.1240.1	lincRNA.1240	675	2	0.447407	ENSOARG00000002973	KCNN3	-9157	ENSOARG00000003056	PMVK	44878	15.3445	23.1172	0.899194
lincRNA.5696.1	lincRNA.5696	996	2	0.36245	ENSOARG00000010085	ensembl	-27307	ENSOARG00000010152	ANKEF1	45463	1.06313	0.706485	0.902591
lincRNA.19416.1	lincRNA.19416	234	2	0.611111	ENSOARG00000013332	LONRF2	-19036	ENSOARG00000013344	ensembl	299657	37.6492	32.6294	0.911068
lincRNA.27816.2	lincRNA.27816	457	2	0.455142	ENSOARG00000000582	SLC25A53	-16231	ENSOARG00000000594	FAM199X	37320	2.80889	3.27109	0.911083
lincRNA.412.2	lincRNA.412	563	3	0.64476	ENSOARG00000004421	CDKN2C	-3482	ENSOARG00000004439	C1orf185	126810	2.06259	2.46819	0.912335
lincRNA.1316.1	lincRNA.1316	408	2	0.544118	ENSOARG00000005974	MEF2D	-21009	ENSOARG00000006003	IQGAP3	22334	1.11481	0.806375	0.913722
lincRNA.6172.1	lincRNA.6172	329	2	0.480243	ENSOARG00000007634	ensembl	-8337	ENSOARG00000007717	GINS1	56458	3.32411	4.33021	0.913722
lincRNA.19140.4	lincRNA.19140	552	4	0.519928	ENSOARG00000003600	ensembl	-68614	ENSOARG00000003753	PSME4	4998	31.1195	34.958	0.918343
lincRNA.15310.1	lincRNA.15310	282	2	0.514184	ENSOARG00000018107	CFL1	-1839	ENSOARG00000018222	MUS81	1955	1.51476	1.10808	0.918718
lincRNA.12973.2	lincRNA.12973	1918	2	0.375912	ENSOARG00000019628	ensembl	-9836	ENSOARG00000017403	AGPS	2889	6.23008	6.97384	0.923352
lincRNA.14730.1	lincRNA.14730	485	2	0.373196	ENSOARG00000018168	RREB1	-395087	ENSOARG00000018347	LY86	14425	2.47838	3.03916	0.928328
lincRNA.16879.1	lincRNA.16879	495	2	0.575758	ENSOARG00000007471	MKL2	-54972	ENSOARG00000007574	PARN	111753	1.25106	1.4887	0.930822
lincRNA.14727.1	lincRNA.14727	798	3	0.532581	ENSOARG00000018168	RREB1	-367222	ENSOARG00000018347	LY86	37257	1.81314	1.58986	0.932498
lincRNA.16593.1	lincRNA.16593	716	2	0.428771	ENSOARG00000006168	ensembl	-115050	ENSOARG00000006262	ensembl	172847	1.31371	0.902279	0.933369
lincRNA.14521.1	lincRNA.14521	534	2	0.537453	ENSOARG00000001335	ensembl	-4474	ENSOARG00000001519	TRIM38	5991	1.57417	1.30469	0.934667
lincRNA.12068.1	lincRNA.12068	787	2	0.579416	ENSOARG00000008125	ensembl	-8417	ENSOARG00000008136	SUSD3	22930	1.19885	1.60163	0.936558
lincRNA.13859.1	lincRNA.13859	338	2	0.538462	ENSOARG00000006435	CLIC4	-20055	ENSOARG00000006453	SRRM1	48918	1.61498	2.03574	0.936982
lincRNA.18630.1	lincRNA.18630	772	2	0.477979	ENSOARG00000013170	GOLGA1	-1407	ENSOARG00000013267	ARPC5L	1358	4.28692	3.8848	0.937411
lincRNA.22144.1	lincRNA.22144	360	2	0.577778	ENSOARG00000018764	ensembl	-22018	ENSOARG00000018801	ensembl	36642	1.5973	1.02867	0.937862
lincRNA.2930.3	lincRNA.2930	413	2	0.445521	ENSOARG00000011001	ensembl	-1689	ENSOARG00000011029	N4BP2L1	1529	23.1258	29.084	0.940036
lincRNA.2930.2	lincRNA.2930	381	2	0.440945	ENSOARG00000011001	ensembl	-1689	ENSOARG00000011029	N4BP2L1	1529	23.1258	29.084	0.940036
lincRNA.12368.2	lincRNA.12368	345	3	0.544928	ENSOARG00000011482	GRHPR	-1839	ENSOARG00000011504	ZCCHC7	45299	5.94405	4.85717	0.941172
lincRNA.5054.2	lincRNA.5054	387	4	0.511628	ENSOARG00000001142	ITPKB	-85179	ENSOARG00000001381	PSEN2	10953	15.3387	16.8769	0.94375
lincRNA.5054.1	lincRNA.5054	531	4	0.502825	ENSOARG00000001142	ITPKB	-83447	ENSOARG00000001381	PSEN2	10950	15.3387	16.8769	0.94375
lincRNA.13175.1	lincRNA.13175	543	3	0.418048	ENSOARG00000009880	ZEB2	-67584	ENSOARG00000009898	GTDC1	71849	7.83252	8.68683	0.944656
lincRNA.972.4	lincRNA.972	266	2	0.37218	ENSOARG00000019841	PHTF1	-4005	ENSOARG00000019870	RSBN1	2104	6.4473	7.3105	0.94483
lincRNA.26302.2	lincRNA.26302	1368	2	0.372807	ENSOARG00000008478	SQLE	-14525	ENSOARG00000008657	ZNF572	1402	2.87163	2.61676	0.945358
lincRNA.26302.1	lincRNA.26302	1437	2	0.367432	ENSOARG00000008478	SQLE	-14515	ENSOARG00000008657	ZNF572	1346	2.87163	2.61676	0.945358
lincRNA.5779.2	lincRNA.5779	676	2	0.411243	ENSOARG00000004401	ensembl	-31346	ENSOARG00000013535	ITIH5	13425	4.12503	4.56157	0.946467
lincRNA.14006.1	lincRNA.14006	813	2	0.555966	ENSOARG00000011553	MFAP2	-1247	ENSOARG00000012143	FBXO42	39903	8.08559	8.70236	0.946722
lincRNA.26874.1	lincRNA.26874	457	3	0.439825	ENSOARG00000011595	GPM6B	-72490	ENSOARG00000011696	GEMIN8	89870	1.07024	1.22439	0.947081
lincRNA.25474.1	lincRNA.25474	1546	2	0.424321	ENSOARG00000007878	NCOA7	-34874	ENSOARG00000007915	HEY2	21620	2.13428	1.9725	0.952968
lincRNA.11711.1	lincRNA.11711	1051	2	0.414843	ENSOARG00000017406	NR2C2	-3541	ENSOARG00000017791	FGD5	13953	1.63547	1.48211	0.952989
lincRNA.12356.1	lincRNA.12356	1812	2	0.479581	ENSOARG00000011430	ensembl	-2859	ENSOARG00000011447	FBXO10	12893	2.91716	3.71203	0.952989
lincRNA.14677.2	lincRNA.14677	5260	2	0.365589	ENSOARG00000014611	ADTRP	-114521	ENSOARG00000014770	TMEM170B	2109	1.50395	1.60662	0.954702
lincRNA.12480.1	lincRNA.12480	594	4	0.457912	ENSOARG00000012672	ANXA1	-69620	ENSOARG00000012689	ensembl	31611	0.855506	0.828273	0.955798
lincRNA.6776.1	lincRNA.6776	1902	2	0.472135	ENSOARG00000008083	DYNLRB2	-43788	ENSOARG00000008095	CDYL2	4450	1.34485	1.43928	0.955867
lincRNA.16750.1	lincRNA.16750	676	2	0.507396	ENSOARG00000000601	FLYWCH2	-3366	ENSOARG00000000607	ensembl	19809	1.55165	1.19014	0.956979
lincRNA.21108.2	lincRNA.21108	890	2	0.414607	ENSOARG00000008280	MEOX2	-2184	ENSOARG00000008410	ISPD	441851	4.41591	3.46152	0.957866
lincRNA.18945.1	lincRNA.18945	1032	2	0.422481	ENSOARG00000020004	SLC1A4	-230764	ENSOARG00000019536	ensembl	108004	1.04042	1.15517	0.958498
lincRNA.4766.3	lincRNA.4766	277	2	0.610108	ENSOARG00000013295	SDK2	-40109	ENSOARG00000013566	CDC42EP4	5250	8.10811	6.95336	0.960115
lincRNA.4766.1	lincRNA.4766	259	2	0.637066	ENSOARG00000013295	SDK2	-28091	ENSOARG00000013566	CDC42EP4	5244	8.10811	6.95336	0.960115
lincRNA.14018.3	lincRNA.14018	982	3	0.565173	ENSOARG00000012215	RSG1	-17644	ENSOARG00000012297	ARHGEF19	5182	11.7913	11.1833	0.961089
lincRNA.3505.1	lincRNA.3505	928	2	0.44181	ENSOARG00000006530	PEX12	-1438	ENSOARG00000006648	SLFN14	8643	8.5965	9.09457	0.961089
lincRNA.3505.2	lincRNA.3505	626	3	0.388179	ENSOARG00000006530	PEX12	-1438	ENSOARG00000006648	SLFN14	8678	8.5965	9.09457	0.961089
lincRNA.7889.2	lincRNA.7889	302	3	0.5	ENSOARG00000000134	ensembl	-130895	ENSOARG00000000144	ensembl	37113	8.16408	6.93912	0.965147
lincRNA.7889.1	lincRNA.7889	253	2	0.501976	ENSOARG00000000134	ensembl	-130895	ENSOARG00000000144	ensembl	37113	8.16408	6.93912	0.965147
lincRNA.11220.1	lincRNA.11220	557	3	0.587074	ENSOARG00000004597	ZNF35	-9854	ENSOARG00000004629	ZNF502	6350	2.42038	2.08248	0.970963
lincRNA.17853.1	lincRNA.17853	1580	2	0.486076	ENSOARG00000009814	ensembl	-2042	ENSOARG00000009853	PPIF	22326	8.2683	8.56994	0.971189
lincRNA.1.2	lincRNA.1	442	2	0.68552	NA		NA	ENSOARG00000017577	ensembl	22605	5.45378	5.691	0.974722
lincRNA.20485.2	lincRNA.20485	493	2	0.460446	ENSOARG00000020855	CREBL2	-58370	ENSOARG00000020857	DUSP16	40863	2.92789	2.78948	0.977073
lincRNA.20485.1	lincRNA.20485	601	2	0.44426	ENSOARG00000020855	CREBL2	-58257	ENSOARG00000020857	DUSP16	40835	2.92789	2.78948	0.977073
lincRNA.10510.1	lincRNA.10510	1225	4	0.448163	ENSOARG00000016409	ensembl	-63144	ENSOARG00000016458	APBA2	295119	0.711228	0.748683	0.979414
lincRNA.6473.1	lincRNA.6473	240	2	0.458333	ENSOARG00000017940	SRC	-100363	ENSOARG00000005426	BLCAP	19366	16.3712	15.2426	0.981927
lincRNA.839.4	lincRNA.839	481	3	0.505198	ENSOARG00000018406	DPH5	-110683	ENSOARG00000010691	S1PR1	91154	3.58692	3.39717	0.98347
lincRNA.13814.2	lincRNA.13814	587	2	0.477002	ENSOARG00000004275	ARID1A	-79406	ENSOARG00000004384	RPS6KA1	33228	1.86201	1.96545	0.98468
lincRNA.11676.1	lincRNA.11676	503	2	0.634195	ENSOARG00000013199	TMCC1	-20290	ENSOARG00000013617	PLXND1	10793	1.22235	1.25605	0.985624
lincRNA.20292.1	lincRNA.20292	438	2	0.543379	ENSOARG00000018691	ensembl	-4562	ENSOARG00000020215	ensembl	20936	1.69843	1.69984	0.985624
lincRNA.14824.1	lincRNA.14824	797	3	0.585947	ENSOARG00000003869	DUSP22	-12439	NA		NA	1.15235	1.19436	0.9885
lincRNA.14496.1	lincRNA.14496	2011	3	0.387867	ENSOARG00000018368	ensembl	-30741	ENSOARG00000018426	ensembl	125974	4.93944	4.89381	0.991346
lincRNA.24003.3	lincRNA.24003	709	3	0.449929	ENSOARG00000009374	FBXL5	-30413	ENSOARG00000009499	ensembl	16649	10.1332	9.98177	0.991549
lincRNA.24003.1	lincRNA.24003	523	2	0.439771	ENSOARG00000009374	FBXL5	-30363	ENSOARG00000009499	ensembl	16647	10.1332	9.98177	0.991549
lincRNA.7359.1	lincRNA.7359	999	5	0.522523	ENSOARG00000005383	ZNF383	-7166	ENSOARG00000005391	ZNF527	50809	2.14498	2.12668	0.993566
lincRNA.15088.1	lincRNA.15088	751	3	0.431425	ENSOARG00000016062	CD6	-19725	ENSOARG00000016138	CD5	40073	3.97759	3.98372	0.994668
lincRNA.8671.2	lincRNA.8671	418	3	0.519139	ENSOARG00000012124	ensembl	-4504	ENSOARG00000012189	DGAT2	18540	5.30002	5.32012	0.997018
lincRNA.22613.2	lincRNA.22613	471	2	0.535032	ENSOARG00000015078	IRF1	-43104	ENSOARG00000015127	SLC22A5	28401	3.54103	3.5341	0.998956
lincRNA.2692.1	lincRNA.2692	264	2	0.522727	ENSOARG00000015558	TBC1D5	-711604	ENSOARG00000015604	SATB1	362110	2.03341	3.03226	1
lincRNA.14965.1	lincRNA.14965	354	3	0.420904	ENSOARG00000007473	LUZP2	-1445176	ENSOARG00000007529	SVIP	161305	1.23457	0.8363	1
lincRNA.21656.1	lincRNA.21656	220	2	0.513636	ENSOARG00000005863	TSGA13	-177324	ENSOARG00000005940	DNAJC8	120676	2.68798	5.04755	1
lincRNA.26218.1	lincRNA.26218	218	2	0.559633	ENSOARG00000005036	KHDRBS3	-558469	ENSOARG00000005227	ZFAT	87195	0.906714	1.33237	1
lincRNA.19225.1	lincRNA.19225	200	2	0.565	ENSOARG00000007545	EML4	-88063	ENSOARG00000007663	PKDCC	73590	6.98749	3.62923	1
lincRNA.8613.1	lincRNA.8613	1041	5	0.575408	ENSOARG00000006995	FCHSD2	-108091	ENSOARG00000006714	P2RY6	55686	0.681332	0.563982	1
lincRNA.26773.1	lincRNA.26773	371	2	0.668464	ENSOARG00000007451	CRLF2	-14962	ENSOARG00000007541	CSF2RA	11802	0.821183	0.545051	1
lincRNA.1646.1	lincRNA.1646	222	2	0.468468	ENSOARG00000001305	HTR1F	-13694	ENSOARG00000001338	CGGBP1	11511	3.86733	1.27904	1
lincRNA.27093.1	lincRNA.27093	279	2	0.516129	ENSOARG00000006040	ensembl	-35371	ENSOARG00000006097	MAGED2	10177	1.77602	0.702201	1
lincRNA.10536.1	lincRNA.10536	334	2	0.443114	ENSOARG00000000664	ACSBG1	-28905	ENSOARG00000000742	DNAJA4	9086	0.956767	1.08594	1
lincRNA.20492.1	lincRNA.20492	565	2	0.382301	ENSOARG00000020865	MANSC1	-36459	ENSOARG00000020875	LRP6	8225	0.61502	0.615139	1
lincRNA.8365.1	lincRNA.8365	205	2	0.526829	ENSOARG00000015942	USP2	-8530	ENSOARG00000016042	THY1	4818	3.01529	1.23753	1
lincRNA.4501.1	lincRNA.4501	469	3	0.422175	ENSOARG00000015595	BPTF	-47635	ENSOARG00000015771	NOL11	3280	0.935511	0.87748	1
lincRNA.5731.1	lincRNA.5731	304	3	0.384868	ENSOARG00000010523	JAG1	-722196	ENSOARG00000010789	BTBD3	724947	1.29173	0.417849	1
lincRNA.26538.1	lincRNA.26538	270	2	0.418519	ENSOARG00000011267	CSMD3	-683739	ENSOARG00000011921	KCNV1	1383178	1.45688	2.92373	1
lincRNA.24377.1	lincRNA.24377	310	2	0.516129	ENSOARG00000018585	NOX5	-26101	ENSOARG00000018604	GLCE	29419	0.798639	1.10747	1
lincRNA.23190.1	lincRNA.23190	280	3	0.507143	ENSOARG00000013403	C1QTNF2	-11034	ENSOARG00000010347	ZBED8	19358	0.811192	0.407203	1
lincRNA.12541.1	lincRNA.12541	658	4	0.521277	ENSOARG00000013337	PUM3	-4496	ENSOARG00000013349	ensembl	22728	0.732167	0.0705239	1
lincRNA.19878.1	lincRNA.19878	262	2	0.473282	ENSOARG00000019661	TWF1	-3712	ENSOARG00000019678	IRAK4	14491	1.39748	0	1
lincRNA.11005.1	lincRNA.11005	336	2	0.520833	NA		NA	ENSOARG00000013441	MRPS24	17870	0.997154	1.05934	1

## Sheet: ilncRNAS
Supplementary File S2. Different charachteristics of the identified novel linRNAs and ilncRNAs in sheep breeds. The blue marked cell denoted transcription factor. Also, the yellow marked cells indicate breed-specefic genes.
Transcript_name	Gene_name	Gene_name	Transcript_Length	Exon_Number	%GC	Parent_Ensembl_Gene_ID	Expression_Lori-Bakhtiari	Expression_Zel	q_value_Gene
ilncRNA.20260.1	ilncRNA.20260	PRDM4	287	2	0.797909	ENSOARG00000017955	277.186	26.4908	0.0824567
ilncRNA.24010.2	ilncRNA.24010	FGFBP1	670	3	0.504478	ENSOARG00000007954	0.639447	4.58857	0.238708
ilncRNA.196.1	ilncRNA.196	ENSOARG00000000604	471	2	0.590234	ENSOARG00000000604	83.3999	47.0473	0.473458
ilncRNA.23490.1	ilncRNA.23490	MCUB	292	3	0.431507	ENSOARG00000006049	4.85349	0	0.528995
ilncRNA.1054.1	ilncRNA.1054	PDE4DIP	241	2	0.639004	ENSOARG00000020482	0	2.62767	0.545018
ilncRNA.21373.1	ilncRNA.21373	NT5C3A	202	2	0.70297	ENSOARG00000006503	12.8512	0	0.561478
ilncRNA.5333.1	ilncRNA.5333	PRKCZ	1092	2	0.572344	ENSOARG00000000422	1.88246	0.638118	0.564464
ilncRNA.12695.1	ilncRNA.12695	ENSOARG00000008914	996	2	0.473896	ENSOARG00000008914	10.8054	7.26288	0.636006
ilncRNA.4666.1	ilncRNA.4666	ENSOARG00000000180	896	3	0.570312	ENSOARG00000000180	17.6216	11.6229	0.647785
ilncRNA.4666.3	ilncRNA.4666	ENSOARG00000000180	423	3	0.574468	ENSOARG00000000180	17.6216	11.6229	0.647785
ilncRNA.4666.2	ilncRNA.4666	ENSOARG00000000180	681	4	0.562408	ENSOARG00000000180	17.6216	11.6229	0.647785
ilncRNA.15826.1	ilncRNA.15826	SLF2	310	2	0.522581	ENSOARG00000015788	4.51763	0.894078	0.665525
ilncRNA.18361.1	ilncRNA.18361	GTF3C5	490	2	0.595918	ENSOARG00000005547	1.20022	0.396547	0.677746
ilncRNA.4638.1	ilncRNA.4638	USP36	521	3	0.527831	ENSOARG00000003393	0.339315	1.53272	0.679349
ilncRNA.11939.1	ilncRNA.11939	KIAA1958	491	2	0.295316	ENSOARG00000006478	1.2767	0.302505	0.689476
ilncRNA.3968.1	ilncRNA.3968	LRRC75A	507	2	0.566075	ENSOARG00000016872	4.84836	1.76534	0.695431
ilncRNA.38.5	ilncRNA.38	ENSOARG00000018428	835	3	0.592814	ENSOARG00000018428	25.753	13.4039	0.703767
ilncRNA.15764.1	ilncRNA.15764	MORN4	377	2	0.498674	ENSOARG00000011022	5.26668	1.06631	0.705299
ilncRNA.2234.1	ilncRNA.2234	B3GALNT1	1842	2	0.339305	ENSOARG00000014923	31.994	10.7277	0.708457
ilncRNA.7071.1	ilncRNA.7071	PDP2	455	2	0.540659	ENSOARG00000011098	6.74803	2.6941	0.70946
ilncRNA.25506.1	ilncRNA.25506	FAM184A	570	2	0.442105	ENSOARG00000008476	2.2932	0.601755	0.717447
ilncRNA.6239.5	ilncRNA.6239	ENSOARG00000026240	625	2	0.5616	ENSOARG00000010995	224.471	107.804	0.741558
ilncRNA.6239.1	ilncRNA.6239	ENSOARG00000026240	631	2	0.557845	ENSOARG00000010995	224.471	107.804	0.741558
ilncRNA.6239.7	ilncRNA.6239	ENSOARG00000026240	611	2	0.558101	ENSOARG00000010995	224.471	107.804	0.741558
ilncRNA.10192.4	ilncRNA.10192	CABIN1	1464	2	0.604508	ENSOARG00000012898	7.80265	4.72723	0.743278
ilncRNA.17411.1	ilncRNA.17411	WIPI2	254	2	0.688976	ENSOARG00000003369	0.408006	2.15959	0.746338
ilncRNA.25109.1	ilncRNA.25109	ZBTB1	819	3	0.443223	ENSOARG00000001006	2.1014	0.508404	0.75081
ilncRNA.19616.1	ilncRNA.19616	BTG1	947	2	0.346357	ENSOARG00000016760	23.551	3.38521	0.760665
ilncRNA.4842.1	ilncRNA.4842	CHI3L1	537	2	0.527002	ENSOARG00000001370	3.32629	0.897025	0.764088
ilncRNA.10374.1	ilncRNA.10374	AKAP13	1183	2	0.486898	ENSOARG00000010666	1.15229	0.44888	0.790923
ilncRNA.6608.1	ilncRNA.6608	PREX1	1510	2	0.518543	ENSOARG00000010543	2.82009	4.21693	0.797383
ilncRNA.21988.4	ilncRNA.21988	ZFP2	1658	5	0.444511	ENSOARG00000001466	7.34725	5.13328	0.80314
ilncRNA.21988.5	ilncRNA.21988	ZFP2	1606	6	0.463263	ENSOARG00000001466	7.34725	5.13328	0.80314
ilncRNA.21988.7	ilncRNA.21988	ZFP2	1622	7	0.466091	ENSOARG00000001466	7.34725	5.13328	0.80314
ilncRNA.21988.6	ilncRNA.21988	ZFP2	768	6	0.509115	ENSOARG00000001466	7.34725	5.13328	0.80314
ilncRNA.22684.1	ilncRNA.22684	TNFAIP8	1414	2	0.324611	ENSOARG00000016662	3.58507	0.704291	0.808469
ilncRNA.17332.2	ilncRNA.17332	AZGP1	356	2	0.561798	ENSOARG00000017973	5.51522	3.27226	0.818098
ilncRNA.332.1	ilncRNA.332	ENSOARG00000000941	434	2	0.559908	ENSOARG00000000941	3.80326	1.96206	0.824214
ilncRNA.24158.2	ilncRNA.24158	ENSOARG00000015218	205	2	0.360976	ENSOARG00000015218	18.211	10.7133	0.84689
ilncRNA.7636.1	ilncRNA.7636	CCDC61	374	2	0.574866	ENSOARG00000010443	1.42286	3.18062	0.859922
ilncRNA.11042.1	ilncRNA.11042	ENSOARG00000007297	310	2	0.696774	ENSOARG00000007297	0.755162	1.6043	0.870081
ilncRNA.9122.2	ilncRNA.9122	SMIM15	1766	3	0.355606	ENSOARG00000005385	7.05259	8.36468	0.884389
ilncRNA.24393.1	ilncRNA.24393	RPLP1	347	2	0.403458	ENSOARG00000018666	1.65218	3.07702	0.894477
ilncRNA.1055.1	ilncRNA.1055	PDE4DIP	3914	2	0.358457	ENSOARG00000020482	3.09941	2.49408	0.915557
ilncRNA.2931.6	ilncRNA.2931	N4BP2L1	1013	2	0.432379	ENSOARG00000011029	19.6013	17.2344	0.919208
ilncRNA.3804.1	ilncRNA.3804	ALOX12	211	2	0.625592	ENSOARG00000009252	9.3928	6.38447	0.927484
ilncRNA.18042.1	ilncRNA.18042	ENSOARG00000004121	441	3	0.555556	ENSOARG00000004121	2.27076	2.13775	0.929908
ilncRNA.26407.3	ilncRNA.26407	ASPH	1767	2	0.34352	ENSOARG00000016594	299.45	236.035	0.931084
ilncRNA.26407.2	ilncRNA.26407	ASPH	1795	2	0.343733	ENSOARG00000016594	299.45	236.035	0.931084
ilncRNA.18535.3	ilncRNA.18535	ENSOARG00000002277	541	2	0.602588	ENSOARG00000002277	8.18251	6.71377	0.933504
ilncRNA.17947.1	ilncRNA.17947	RASSF4	540	2	0.57963	ENSOARG00000003708	3.09783	2.37278	0.938726
ilncRNA.4841.2	ilncRNA.4841	MYBPH	638	2	0.507837	ENSOARG00000001277	4.48623	3.59729	0.949482
ilncRNA.7896.1	ilncRNA.7896	ENSOARG00000000299	434	4	0.428571	ENSOARG00000000299	2.11737	1.77232	0.952989
ilncRNA.4984.1	ilncRNA.4984	TGFB2	580	3	0.517241	ENSOARG00000011583	1.58292	1.18232	0.954678
ilncRNA.22487.1	ilncRNA.22487	LONP1	290	2	0.755172	ENSOARG00000016518	2.70192	2.17458	0.966026
ilncRNA.2456.1	ilncRNA.2456	NCK1	365	2	0.534247	ENSOARG00000007798	1.59397	1.4831	0.976279
ilncRNA.15041.1	ilncRNA.15041	CDON	523	2	0.407266	ENSOARG00000012075	1.37563	1.23365	0.976664
ilncRNA.25256.1	ilncRNA.25256	BATF	438	3	0.447489	ENSOARG00000001812	2.16799	1.99579	0.979361
ilncRNA.8166.1	ilncRNA.8166	BIRC3	812	2	0.39532	ENSOARG00000006356	3.8865	4.1971	0.982738
ilncRNA.26174.2	ilncRNA.26174	ENSOARG00000000914	1010	3	0.676238	ENSOARG00000000914	5.48722	5.38479	0.993717
ilncRNA.5069.2	ilncRNA.5069	CNST	2478	2	0.382163	ENSOARG00000003967	4.44536	4.47246	0.995368
ilncRNA.11253.1	ilncRNA.11253	THUMPD3	238	2	0.415966	ENSOARG00000007139	1.2456	0.974641	1
ilncRNA.17150.1	ilncRNA.17150	NUPR2	386	3	0.463731	ENSOARG00000010802	0.850663	0.680556	1
ilncRNA.5018.1	ilncRNA.5018	AIDA	278	2	0.489209	ENSOARG00000013880	0.819458	0.486573	1
ilncRNA.8699.1	ilncRNA.8699	ACER3	746	2	0.558981	ENSOARG00000013240	0.844386	0.415633	1
ilncRNA.8910.1	ilncRNA.8910	ENSOARG00000009962	384	2	0.643229	ENSOARG00000009962	0.986781	0.558361	1
